# Supplementary material for: Hepatokine ITIH3 protects against hepatic steatosis by downregulating mitochondrial bioenergetics and de novo lipogenesis
Source: PubMed Central journal article supplement — iScience. 2024 Apr 10;27(5):109709. doi: 10.1016/j.isci.2024.109709 (PMC11059128; doi:10.1016/j.isci.2024.109709), 2024-04-10
Supplement: mmc1.pdf [file mmc1.pdf]

**Supplemental information**

**Hepatokine ITIH3 protects against hepatic  
steatosis by downregulating mitochondrial  
bioenergetics and *de novo* lipogenesis**

**Noble Kumar Talari, Ushodaya Mattam, Dorota Kaminska, Irene Sotomayor-Rodriguez, Afra P. Rahman, Miklós Péterfy, Päivi Pajukanta, Jussi Pihlajamäki, and Karthickeyan Chella Krishnan**

## A CDAHFD-induced NAFLD/NASH model

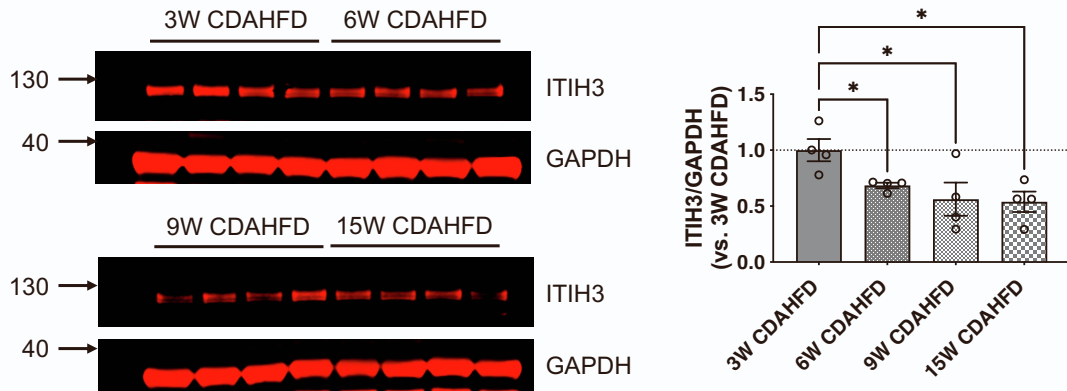

**Figure S1. ITIH3 is negatively associated with NAFLD/NASH in mice.** *Related to Figure 1. (A)* Immunoblot analyses of hepatic ITIH3 and their respective quantification from C57BL/6J mice maintained on a choline-deficient, L-amino acid-defined, high-fat diet (CDAHFD) at different timepoints to develop different stages of NAFLD/NASH. GAPDH was used as a loading control. Data are presented as mean  $\pm$  SEM (n = 4 mice per group). P values were calculated by one-factor ANOVA corrected by post-hoc ‘Holm-Sidak’s’ multiple comparisons test. \*P < 0.05.

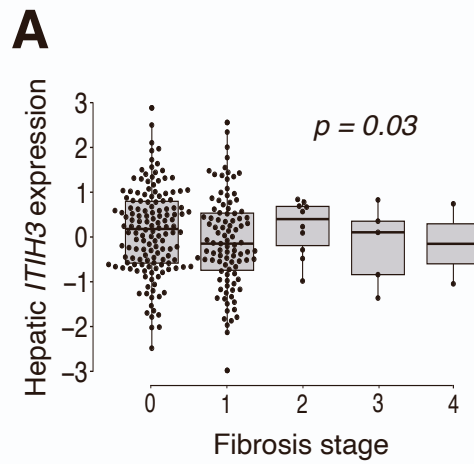

**Figure S2. *ITIH3* is negatively associated with Fibrosis in humans.** *Related to Figure 1. (A)* Hepatic *ITIH3* expression from KOBS cohort (n = 262) grouped by Fibrosis stage. Data are presented as median and interquartile range (boxplots). P values were calculated by ANCOVA corrected for age, BMI, and sex. BMI, body mass index.

### A ITIH3 knockdown

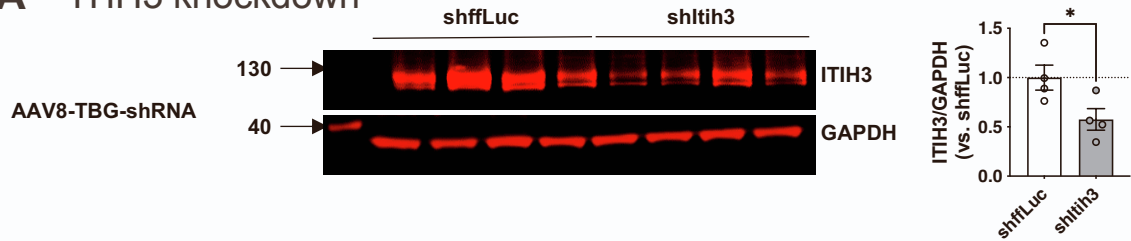

### B ITIH3 overexpression

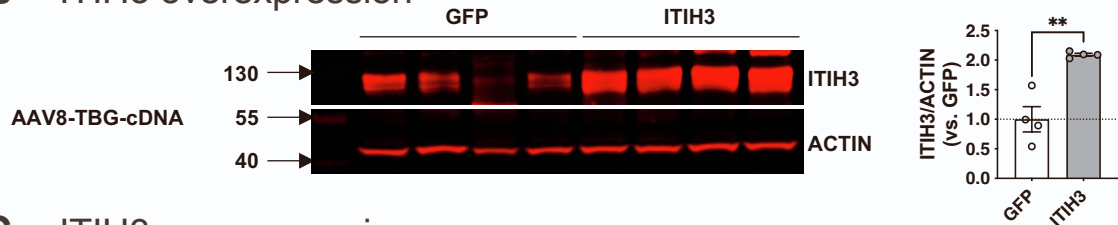

### C ITIH3 overexpression

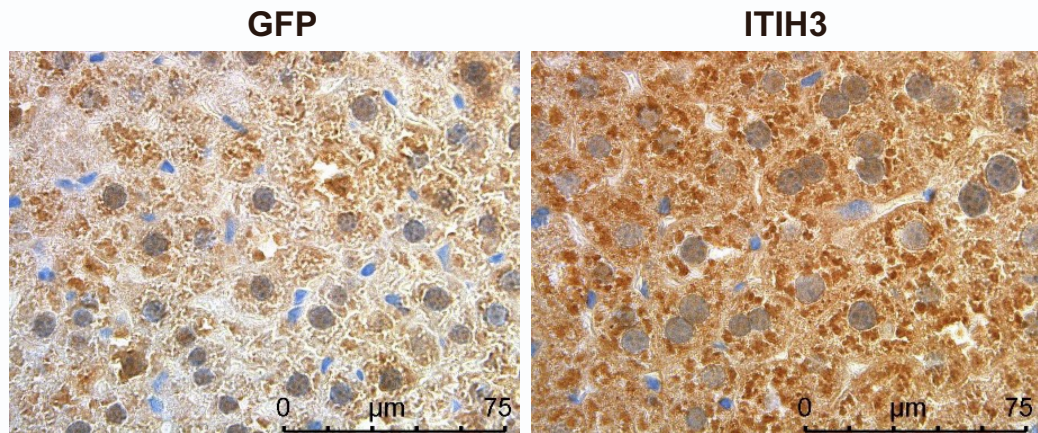

**Figure S3. AAV-mediated modulation of hepatic ITIH3 expression.** *Related to Figure 2.* Eight-week-old male C57BL/6J mice were injected with either loss-of-function (shffLuc or shItih3) or gain-of-function (GFP or ITIH3) AAV vectors under the control of TBG promoter and fed a HF/HS diet for eight additional weeks. Immunoblot analyses of hepatic ITIH3 in (A) ITIH3 knockdown and (B) overexpression mice and their respective quantification. GAPDH was used as a loading control. (C) Representative immunohistochemical analyses of hepatic ITIH3 in GFP and ITIH3 overexpression mice. Data are presented as mean  $\pm$  SEM (n = 4 mice per group). P values were calculated by t test. \*P < 0.05; \*\*P < 0.01.

**A**

**GFP**

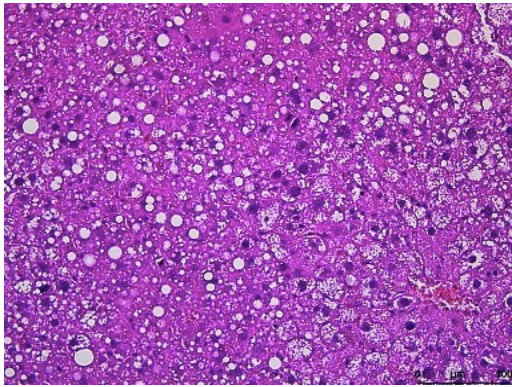

**ITI13**

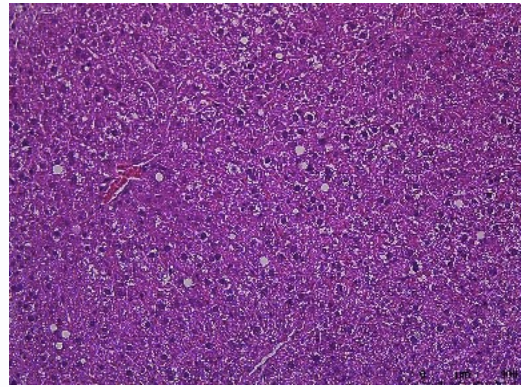

**Figure S4. ITIH3 lowers liver lipid droplet accumulation *in vivo*.** Related to Figure 2. Eight-week-old male C57BL/6J mice were injected with gain-of-function (GFP or ITIH3) AAV vectors under the control of TBG promoter and fed a HF/HS diet for eight additional weeks. (A) Representative images of H&E staining of livers overexpressing GFP or ITIH3 are shown.

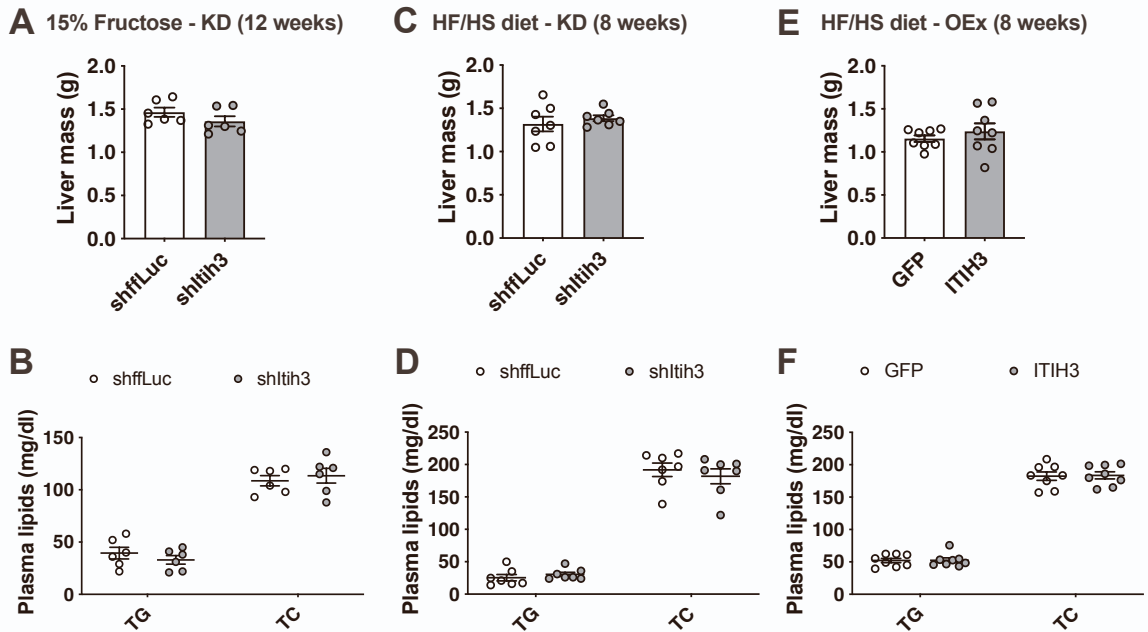

**Figure S5. ITIH3 did not alter liver mass and plasma lipids.** *Related to Figure 2.* Comparisons of (A, C and E) liver mass and (B, D and F) plasma TG and TC levels from (A and B) 15% fructose in drinking water or (C and D) HF/HS fed ITIH3 silencing (KD) mice or (E and F) HF/HS fed ITIH3 overexpressing (OEx) mice, respectively. Data are presented as mean  $\pm$  SEM (n = 6-8 mice per group). TG, triglyceride; TC, total cholesterol.

15% Fructose - KD (12 weeks)

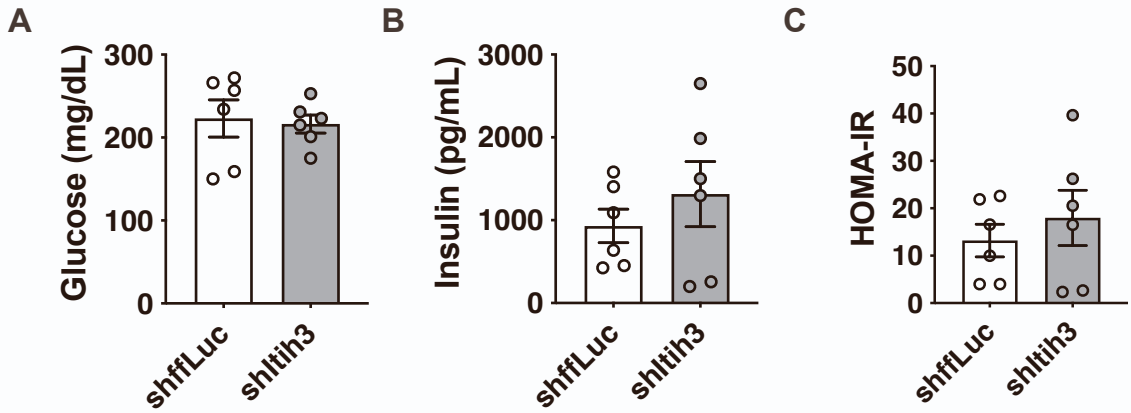

HF/HS diet - KD (8 weeks)

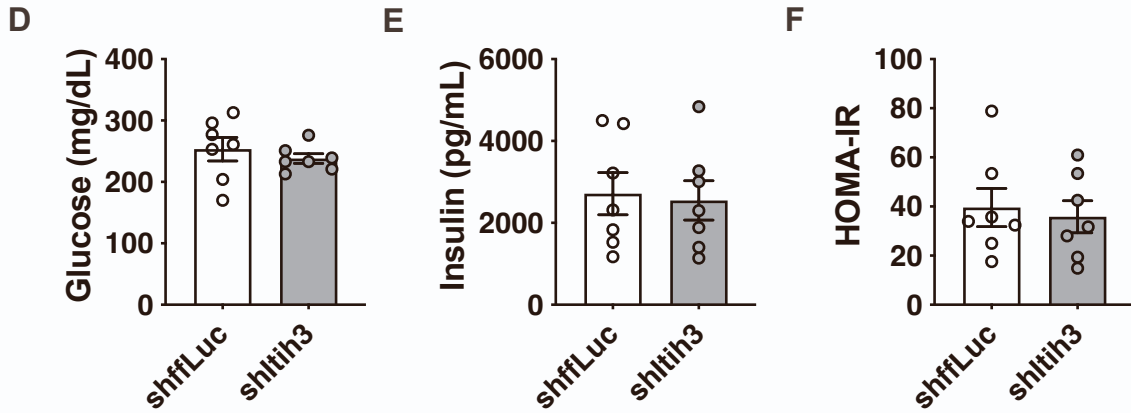

**Figure S6. ITIH3 did not alter fasting plasma glucose and insulin levels as well as HOMA-IR.** Related to Figure 2. Comparisons of fasting plasma (A and D) glucose and (B and E) insulin levels and (C and F) HOMA-IR from (A, B and C) 15% fructose in drinking water or (D, E and F) HF/HS fed ITIH3 silencing (KD) mice, respectively. Data are presented as mean  $\pm$  SEM (n = 6-7 mice per group). HOMA-IR, Homeostatic Model Assessment for Insulin Resistance.

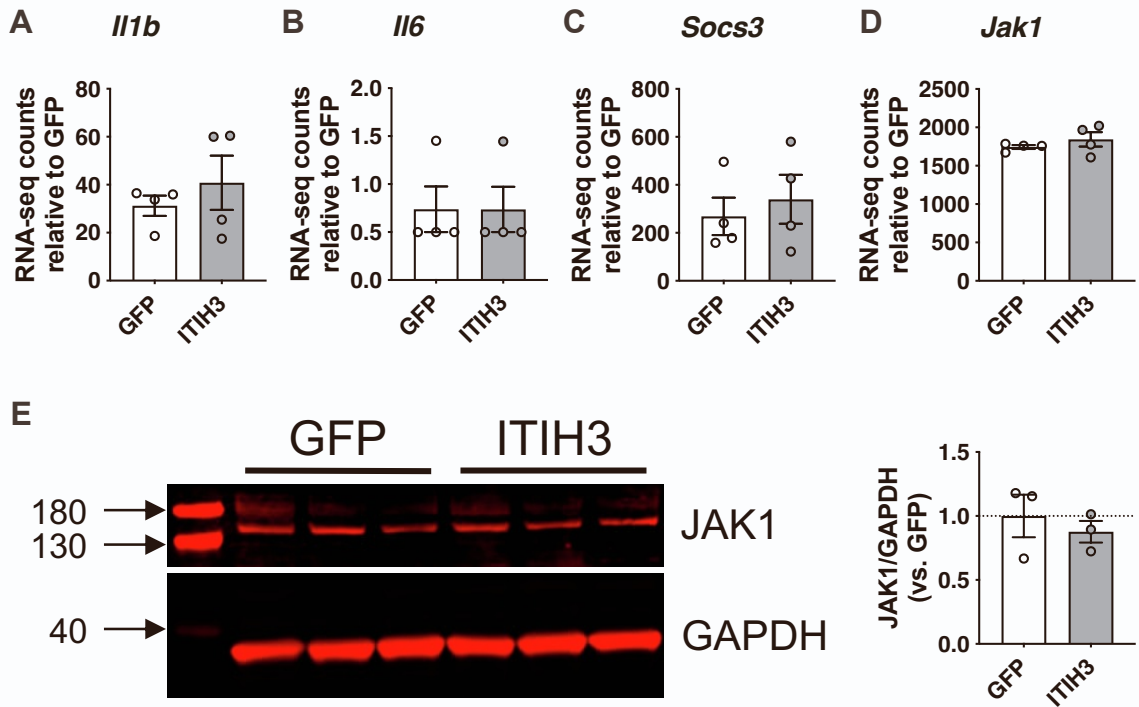

**Figure S7. ITIH3 did not alter IL-6/JAK pathway-related transcripts.** *Related to Figure 4.* RNA counts of (A) *Il1b*, (B) *Il6*, (C) *Socs3*, and (D) *Jak1* in ITIH3 overexpressing mice. Follow-up (E) immunoblot analyses and their respective quantification of liver JAK1 in GFP or ITIH3 overexpressing mice. GAPDH was used as a loading control. Data are presented as mean  $\pm$  SEM ( $n = 4$  mice for transcriptomics and  $n = 3$  mice for immunoblot analyses per group). P values were calculated by (A – D) Wald test; (E) t test. \* $P < 0.05$ ; \*\* $P < 0.01$ ; \*\*\* $P < 0.001$ .



**Table S3. Clinical characteristics and liver histology of 262 KOBS study participants with gene expression data. Related to STAR Methods.**

|                                        | N                                       |
|----------------------------------------|-----------------------------------------|
| Ethnicity                              | Finns - white all from Kuopio city area |
| Sex (F/M)                              | 182/80                                  |
| T2D, N (%)                             | 94 (35.9)                               |
| Age (years)                            | 48.71 [42.32, 55.38]                    |
| BMI (kg/m <sup>2</sup> )               | 42.47 [39.15, 46.16]                    |
| Cholesterol (mmol/L)                   | 4.10 [3.50, 4.70]                       |
| HDL (mmol/L)                           | 1.07 [0.90, 1.27]                       |
| LDL (mmol/L)                           | 2.25 [1.73, 2.80]                       |
| TG (mmol/L)                            | 1.38 [1.06, 1.88]                       |
| Glucose (mmol/L)                       | 6.00 [5.40, 6.70]                       |
| Insulin (pmol/L)                       | 111.11 [73.61, 162.50]                  |
| Steatosis grade, N (%)                 |                                         |
| 0                                      | 105 (40.1)                              |
| 1                                      | 95 (36.3)                               |
| 2                                      | 33 (12.6)                               |
| 3                                      | 9 (11.1)                                |
| Lobular inflammation, N (%)            |                                         |
| 0                                      | 179 (68.3)                              |
| 1                                      | 67 (25.6)                               |
| 2                                      | 16 ( 6.1)                               |
| Hepatocellular ballooning grade, N (%) |                                         |
| 0                                      | 195 (74.7)                              |
| 1                                      | 65 (24.9)                               |
| 2                                      | 1 ( 0.4)                                |
| Fibrosis stage, N (%)                  |                                         |
| 0                                      | 146 (55.7)                              |
| 1                                      | 99 (37.8)                               |
| 2                                      | 10 ( 3.8)                               |
| 3                                      | 5 ( 1.9)                                |
| 4                                      | 2 ( 0.8)                                |

Data are shown as median (interquartile range) or n (%) according to distribution of variables. BMI: body mass index; HDL: high density lipoprotein; LDL: low density lipoprotein.
